18 **ABSTRACT**

19 Arboviruses cause the most devastating diseases in humans and animals worldwide. Several  
20 hundred arbovirus are transmitted by mosquitoes, sand flies or ticks and are responsible for more  
21 than million deaths annually. Development of a model system is essential to extrapolate the  
22 molecular events occurring during infection in the human and mosquito host. Virus overlay protein  
23 binding assay (VOPBA) combined with MALDI TOF/TOF MS revealed that Dengue-2 virus  
24 (DENV-2) exploits similar protein molecules in *Drosophila melanogaster* and *Aedes aegypti* for its  
25 infection. Furthermore, the virus susceptibility studies revealed that DENV-2 could propagate in *D.*  
26 *melanogaster*, and DENV-2 produced in fruit fly is equally infectious to *D. melanogaster* and *Ae.*  
27 *aegypti*. Additionally, real time PCR analysis revealed that RNAi coupled with JAK-STAT and Toll  
28 pathway constitutes an effector mechanism to control the DENV-2 infection in flies. These  
29 observations point out that *D. melanogaster* harbors all necessary machineries to support the growth  
30 of arboviruses. With the availability of well-established techniques for genetic and developmental  
31 manipulations, *D. melanogaster*, offers itself as the potential model system for the study of  
32 arbovirus-vector interactions.

33

34 **Keywords:** Arbovirus-vector interactions, house keeping molecules, insect model system, RNAi,  
35 virus overlay protein binding assay

36

## 37 INTRODUCTION

38 The molecular and biochemical basis of the invertebrate host specificity to arboviruses is interesting  
39 but comparatively less understood phenomenon. Most of the virus/parasite interacting proteins are  
40 house keeping in nature<sup>1-5</sup> (also see Supplementary Information Table S1). For example, actin, Heat  
41 shock proteins, prohibitin and tubulin are reported as arbovirus interacting proteins in *Aedes*  
42 cells<sup>2,3,5-7</sup>. These polypeptides are present ubiquitously in other insects also. As parasites/viruses are  
43 dependent on their symbionts for reproduction, we might expect that it would be advantageous for  
44 parasites/viruses to have broad host ranges and an abundance of potential vectors. Susceptibility,  
45 early multiplication and production of virulent *Plasmodium gallinaceum* in non-vector non  
46 hematophagous insect *Drosophila melanogaster* support this hypothesis<sup>8</sup>. Arboviruses infect more  
47 than 100 million people worldwide every year. The cellular mechanism for transmission and the  
48 complex molecular interplay between arboviruses and their vectors are not well characterized. It has  
49 hampered development of novel strategies for disease intervention and control. Genomic sequences  
50 are available for various diseases causing vectors in literature and Genomic databases<sup>8</sup>. Molecular  
51 mechanisms associated with virus propagation in mosquito have been studied using genomics  
52 approach in *Ae. aegypti* and *Anopheles* mosquitoes<sup>10-12</sup>. In these two species, the availability of the  
53 whole genome sequences helped in identification of possible molecular mechanisms involved in  
54 virus infections. However, in many other insect vectors such as ticks, sand flies, fleas and other  
55 members of Culicidae family, limited specific proteomics information limit the in depth  
56 understanding of vector parasite interaction in these species. Considering the sequence and function  
57 similarities in the receptor polypeptide components, house keeping proteins, innate immune system  
58 genes and other regulatory gene sequences in the eukaryotes, it could be feasible to establish a test  
59 system for the study invertebrate parasite/virus interactions.

60 The *Drosophila* model system has been explored to study a variety of human infections and  
61 diseases<sup>12-18</sup>. Furthermore, the utility of *D. melanogaster* as a host model system for understanding  
62 cellular interactions of various human pathogens has been well-established<sup>8,19-28</sup>. However, *D.*

63 *melanogaster* underutilized in arbovirus studies and holds great potential in the understanding  
64 mechanisms involved in arbovirus pathogenesis. Therefore, as a step towards understanding the  
65 molecular mechanisms involved in arbovirus-vector interactions, the present work seeks to develop  
66 a *Drosophila* model of dengue infection that better reflects the molecular events in the human and  
67 mosquito infections.

68 In the current study, we report that *D. melanogaster* can serve as a useful model system for  
69 the growth and the propagation of DENV-2. The virus produced in *D. melanogaster* can also infect  
70 the *Ae. aegypti* similar to the virus grown in mosquito. We report that the infectivity and  
71 multiplication of the virus grown in *D. melanogaster* and *Ae. aegypti* is comparable. *Drosophila*  
72 model system has biosafety advantage over *Ae. aegypti*, as *Drosophila* do not feed on blood and  
73 never transmit any infectious diseases through bite. Therefore, the application of this model system  
74 thus could also be extended to the other arboviral infection analysis.

75

## 76 **MATERIAL AND METHODS**

### 77 *Ethics statement*

78 Rules laid by Institutional Animal Ethics Committee (IAEC) affiliated with National Institute of  
79 Virology (NIV), Pune, India were followed for handling of animals. These experiments were  
80 carried out in a biosafety level-2 facility of the NIV. All animal experiments were approved by the  
81 IAEC and experiments were performed as per the guidelines laid by the Committee for the Purpose  
82 of Control and Supervision of Experiment on Animals (CPCSEA), India.

### 83 *Drosophila flies and Ae. aegypti mosquito*

84 Oregon K stocks of *D. melanogaster* were grown on standard cornmeal–agar medium at 24°C. *Ae.*  
85 *aegypti* mosquitoes were reared in laboratory conditions at 28±1 °C, 70±5% relative humidity (RH)  
86 and light: dark (LD) 12:12 h. Adult mosquitoes and flies, 3–6 days of age were used in the infection  
87 experiments.

### 88 *Virus stock preparation*

89 Virus stock was prepared by inoculating TR1751 strain of DENV-2 in mice by following the  
90 procedure described earlier<sup>29</sup>. Virus titer of randomly picked vial was determined by plaque assay  
91 ( $8.23 \times 10^6$  PFU/ml).

#### 92 *Plaque assay*

93 The DENV-2 titer in the flies and mosquitoes was calculated using plaque assay method as  
94 described earlier<sup>29</sup>. The virus titer in the carcasses individual mosquito (virus blood fed or virus  
95 injected) or fly (virus injected) was reported as plaque forming units (PFU) (values are expressed as  
96 the mean  $\pm$  SD).

#### 97 *DENV-2 infection*

98 Infections were carried out by injecting  $\sim 1 \mu\text{l}$  of a viral suspension ( $8.23 \times 10^6$  PFU /ml) into the  
99 thoraces of *D. melanogaster* adult flies (n=246) and *Ae. aegypti* (n=168). Actual injected titer of  
100 DENV-2 was determined using plaque assay at 2h p.i.. Infected flies were then maintained at 24° C.  
101 *Ae. aegypti* mosquitoes were infected with DENV-2 via blood through membrane feeder (n=76) and  
102 then maintained at 24°C for 11 days. To check infectious nature of DENV-2 produced in *D.*  
103 *melanogaster*, carcasses of DENV-2 positive flies were crushed and centrifuged at 4°C , 10000  
104 rpm, for 30 min and supernatant filtered through 0.22 $\mu\text{m}$  syringe filter and inoculated in *D.*  
105 *melanogaster* (n=94). The homogenates were mixed with blood and oral fed to *Ae. aegypti* (n=82).

#### 106 *Antibodies*

107 DENV-2 was inoculated in three-four weeks old Swiss albino mice intra-peritoneally and booster  
108 doses of DENV-2 were given (one dose/week) along with Freund's incomplete adjuvant (1:1) for  
109 two weeks. The mice were injected with 10% ascitic tumor cells intra-peritoneally. The intra-  
110 peritoneal fluid collected and after removal of the debris by centrifugation, the supernatant was used  
111 to check for the presence of antibodies. Anti DENV-2 antibodies were incubated with the mosquito  
112 midgut extract to remove the non-specific antibodies. The protein-A column was used to purify the  
113 antibodies. The pre-immune serum was collected and checked for presence of non specific  
114 antibodies against the DENV-2.

115 Monoclonal antibodies against *D. melanogaster* anti-beta actin antibody [mAbcam 8224] -  
116 loading control [ab8224] (Abcam, USA), anti- tubulin antibody [T0950] (Sigma, USA),  
117 Monoclonal Anti-Hsc70 (Hsp73) antibody [SAB3701436] (Sigma, USA), anti-HSP70 antibody  
118 ([5A5] (ab2787), Abcam, USA) and anti-prohibitin antibody [EP2803Y] (ab75766) (Abcam, USA)  
119 were used to confirm the results obtained in the various assays.

#### 120 *Detection of dengue viral antigen in the head squashes*

121 The presence of viral antigen was determined by indirect immunofluorescence assay (IFA) in the  
122 head squashes of mosquitoes/flyes as described by Apte-Deshpande *et al.*<sup>29</sup>. Along with each  
123 experiment, positive and negative controls were processed using the same protocol. Presence of  
124 DENV-2 antigen detected in head squash preparation of *D. melanogaster* flyes on everyday till 10  
125 days post infection (p.i.).

#### 126 *Membrane Fraction isolation*

127 Brush-border membrane fractions (BBMF) from guts of *Drosophila* were isolated according to the  
128 procedure described earlier<sup>2</sup>.

#### 129 *Virus Overlay Protein Binding Assay (VOPBA)*

130 VOPBA was performed to identify cell polypeptides involved in virus binding following the  
131 procedure described earlier<sup>2</sup>. Experiments were performed independently four times and negative  
132 controls (without virus incubation, without antibody incubation) were kept. In VOPBA, interacting  
133 proteins were identified, therefore no positive control is available for this assay.

#### 134 *Protein identification using MALDI-TOF/TOF MS*

135 Bands corresponding to DENV-2-binding activity were excised from gels and were subjected to  
136 reduction, alkylation, followed by in-gel digestion with trypsin. Extracted peptides were desalted  
137 using the column and were separated on a Biobasic C18 capillary column. The chromatographically  
138 separated peptide masses were analyzed by matrix-assisted laser desorption/ionization time of flight  
139 (MALDI-TOF/TOF) on Ultraflex TOF/TOF (Bruker Daltonics, Germany). The proteins were  
140 identified using the mass spectrum produced from each sample by searching the m/z values against

141 the protein databases (NCBI Inr, MSDB, and Swissprot) using the MASCOT, MSfit and Profound  
142 search engine. Parameters used for identification of proteins were fragment ion mass tolerance of  
143 0.40 Da, parent ion tolerance of 0.4 Da and iodoacetamide derivative of cysteine as a fixed  
144 modification. The monoclonal anti-prohibitin antibody ([EP2803Y, ab75766, Abcam, USA), anti-  
145 tubulin antibody (T0950 Sigma, Aldrich, Germany), anti-HSP70 antibody ([5A5] (ab2787), Abcam,  
146 USA) were used to validate the results obtained in the MALDI TOF/TOF MS analysis.

#### 147 *RNA isolation*

148 The QIAamp viral RNA mini kit (Qiagen USA) was used to isolate the viral RNA from carcasses of  
149 flies. Total RNA was isolated from DENV-2 positive carcasses of *Ae. Aegypti* and *D. melanogaster*  
150 flies using the RNA purification kit (Ambion-Thermo Fisher USA).

#### 151 *Detection of DENV by RT-PCR*

152 Detection of DENV-2 in *D. melanogaster* and *Ae. aegypti* was performed using a RT-PCR  
153 procedures described earlier<sup>30</sup>. The viral RNA was converted into cDNA using Goscript cDNA  
154 synthesis system and the PCR amplification was performed in a Veriti thermocycler (Life  
155 technology, USA). Negative controls consisted of RNA from uninfected *Ae. aegypti* and *D.*  
156 *melanogaster* flies and water instead RNA. The second round of PCR was performed with 2 µl of  
157 sample from first round of amplification reaction.

#### 158 *Real-time qPCR assays*

159 RNA samples (2µg) were incubated with Turbo DNase (Ambion, USA) and reverse-transcribed  
160 using High capacity cDNA synthesis system (Life technologies, USA). Real-time relative  
161 quantification of 50 ng of cDNA was carried out using the Power SYBR Green PCR Kit (Life  
162 technologies, USA) and ABI Detection System ABI 7300 (Applied Biosystems, USA). Four  
163 independent biological replicates were conducted for each sample which were loaded in duplicates.  
164 Primer sequences for *Drosophila* genes were retrieved from Flyprimerbank<sup>31</sup> and are listed in Table  
165 1. Fluorescence detection was performed at the end of each extension step and amplicon specificity  
166 was checked by dissociation curve analysis at a rate of 1°C every 30 s from 60 to 95°C. All samples

167 were amplified in duplicate from the same RNA sample and the mean value was calculated and was  
168 used for relative fold change analysis. The quantitative expression of the target gene was  
169 normalized to 18s mRNA in the same samples.

#### 170 2.15 Statistical analysis

171 The groups (control vs infected, *Aedes aegypti* DENV-2 injected vs *Drosophila* DENV-2 injected,  
172 2 hrs p.i. vs 7 days p.i., fold change in control vs infected flies) were compared by nonparametric  
173 Mann-Whitney U test. The viral loads were log-transformed and were compared by non-parametric  
174 Mann-Whitney U test.

175

## 176 **RESULTS**

### 177 *Does DENV-2 exploit similar molecules in different insects?*

178 The studies on DENV interacting proteins in *Aedes* cells suggest that housekeeping molecules are  
179 exploited by DENV to establish the infection. Therefore, we identified the *D. melanogaster* gut  
180 BBMF proteins which are interacting with DENV-2 using one dimensional and two dimensional  
181 VOPBA and MALDI TOF/TOF analysis.

182 When immobilized brush border membrane fraction polypeptides were incubated with  
183 DENV-2, seven polypeptides, Belle, gamma-tubulin ring complex subunit, HSP 70Ba, ATP  
184 synthase subunit beta, probable tubulin beta chain, prohibitin and RNA recognition protein were  
185 detected as DENV-2 binding proteins in brush border membrane fraction of *D. melanogaster* (Fig.  
186 1; Table 2, Supplementary Information Table 2). The identification of protein bands were further  
187 confirmed using monoclonal antibodies. DENV-2 interacting proteins documented earlier and the  
188 observations of current study suggest that *Drosophila* possesses the necessary molecules which  
189 could help DENV-2 in establishing the infection (Supplementary Information Table S1 for DENV  
190 binding proteins in insect cells). Therefore, it would be useful to test the susceptibility of *D.*  
191 *melanogaster* to DENV-2 by injecting non lethal dose of DENV-2 in thoracic region of adult flies  
192 [Exposure of *D. melanogaster* flies to a low dose of DENV-2 (~1  $\mu$ l of  $8.23 \times 10^6$  PFU/ml) did not



193 have an effect on life span nor increased mortality compared to controls Logrank test  $P=0.73$  data  
194 not shown].

#### 195 *Susceptibility of D. melanogaster to DENV-2*

196 To determine the DENV-2 susceptibility, a non lethal dose of DENV-2 virus ( $\sim 1 \mu\text{l}$  of  $8.23 \times 10^6$   
197 PFU/ml) was injected in thoracic region of adult *Drosophila* flies. DENV-2 was detected in *D.*  
198 *melanogaster* midgut, brain and carcasses every day till 10 days p.i.. Immuno-fluorescence  
199 microscopy showed the presence of DENV-2 in *D. melanogaster* brain after 7 days of post infection  
200 (Fig. 2A). Detection of virus in gut tissue in addition to its time dependent appearance in brain  
201 indicated propagation of virus in the body of *D. melanogaster* flies (Fig. 2A). RT-PCR results  
202 showed the presence of DENV-2 in carcasses of *D. melanogaster* (Fig. 2B). Sequencing of RT-PCR  
203 product confirmed the specificity of RT-PCR. Susceptibility of *D. melanogaster* ( $61\% \pm 6.4$ ) to  
204 DENV-2 at 7 days p.i. was found to be comparable to *Ae. aegypti* ( $72\% \pm 13$ ) (Mann-Whitney U test  
205  $P > 0.05$ ) (Fig. 2C).

#### 206 *Determination of infectivity of D. melanogaster generated DENV-2*

207 In order to determine infectious nature of DENV-2 produced in *D. melanogaster*, both *D.*  
208 *melanogaster* and *Ae. aegypti* were infected with homogenates of DENV-2 virus positive flies. In  
209 orally fed *Ae. aegypti*, the DENV-2 antigen was detected in head squash preparations after 11 days  
210 (24%), while 56 % of inoculated *D. melanogaster* showed presence of DENV-2 in brain after 7  
211 days (Fig. 2C). These data not only confirmed the *D. melanogaster* susceptibility to DENV-2, but  
212 also demonstrated that the infectious nature of *D. melanogaster* generated DENV-2. These  
213 experiments were repeated several times with reproducible results.

#### 214 *DENV-2 quantitation using plaque assay*

215 Plaque assays were used to determine the multiplication of DENV-2 in *Ae. Aegypti* and *D.*  
216 *melanogaster*. *Ae. aegypti* mosquitoes were infected with DENV-2 by oral feeding and intra-  
217 thoracic inoculation and *D. melanogaster* flies were infected intra thoracically with DENV-2 and  
218 were maintained at  $28^\circ\text{C}$  for 7 days. The DENV-2 titers in the carcasses of DENV-2 positive insects

219 were determined by plaque assay (Fig. 2D). No significant difference was observed in DENV-2  
220 viral load at 2 hrs p.i. in DENV-2 inoculated *Ae. aegypti* (5408±862 PFU/mosquito) and *D.*  
221 *melanogaster* (4511±968 PFU/fly) (Mann-Whitney U test  $P>0.05$ ). These observations suggest that  
222 similar dose of DENV-2 was given to *Ae. aegypti* and *D. melanogaster*. At 7 days p.i., as compared  
223 to 2 h p.i., DENV-2 viral load was significantly increased in *Ae. aegypti* (85000±2684  
224 PFU/mosquito) (Mann-Whitney U test  $P<0.05$ ) and *D. melanogaster* (56983±8962 PFU/fly)  
225 (Mann-Whitney U test  $P<0.05$ ). The homogenates of DENV-2 positive *D. melanogaster* was used  
226 to infect *D. melanogaster* and *Ae. aegypti*. At 7 days p.i., as compared to 2 h p.i., the DENV-2 viral  
227 load was significantly increased in oral fed *Ae. aegypti* (12569±9638 PFU/mosquito) (Mann-  
228 Whitney U test  $P<0.05$ ) and intra thoracic injected *D. melanogaster* (26982±12692 PFU/fly)  
229 (Mann-Whitney U test  $P<0.05$ ). At 7 days p.i., the virus titer in intra thoracic injected *D.*  
230 *melanogaster* and *Ae. Aegypti* flies was almost similar (Mann-Whitney U test  $P>0.05$ ).

#### 231 *Anti-DENV-2 response in D. melanogaster*

232 The antiviral response of *D. melanogaster* against the DENV-2 virus infection was checked in  
233 selected antiviral pathway genes using the qPCR assays. The expression levels of key components  
234 of JAK-STAT, RNA interference (RNAi) and Toll pathway were assessed in DENV-2 infected *D.*  
235 *melanogaster* using qPCR at 24h, 48h and 7 days p.i.. DENV-2 stimulates the transcriptional  
236 activation of RNAi, JAK-STAT and Toll pathway (Table 3). Transcript levels of key mediators of  
237 RNAi pathway, Argonaute 1, Argonaute 2, Argonaute 3, Dicer 1, Dicer 2, Drosha and Pasha were  
238 up-regulated during course of DENV-2 infection (Mann-Whitney U test  $P<0.05$ ). ADAR, FMR,  
239 Loqs, RNBP and VIG showed slight variation in transcript levels in response to DENV-2 infection  
240 (Table 3). Transcript levels of JAK, STAT, Prohibitin, Rel1 and Toll were up-regd during DENV-2  
241 infection (Table 3) (Mann-Whitney U test  $P<0.05$ ).

242

## 243 **DISCUSSION**

244 Availability of large volume of information on genetics, development and genome of *D.*  
245 *melanogaster* as well as its potential to use as a test system to analyze human diseases<sup>12-18</sup>, makes  
246 this non vector dipteran as an attractive model to study the pathogens and propagation in these  
247 pathogens in the insect model systems<sup>19-24,27</sup>. Using genome-wide RNA interference screen in *D.*  
248 *melanogaster* the insect host factors required for DENV propagation were identified<sup>25</sup>. The results  
249 of Sessions et al.<sup>25</sup> study indicate that remarkable conservation in required factors between the  
250 dipteran and human hosts. Recently it has been demonstrated that RNA interference modulates the  
251 replication of dengue virus in *D. melanogaster* cells<sup>25,32</sup>. Results obtained in these studies clearly  
252 suggest that DENV could propagate in *Drosophila* cells. Recently Rences et al.<sup>33,34</sup> utilized the *D.*  
253 *melanogaster* and *Ae. aegypti* to understand the molecular mechanisms involved in *Wolbachia*-  
254 mediated pathogen protection. The infection with *Wolbachia* efficiently reduced the DENV  
255 replication in *D. melanogaster* as well as in *Ae. aegypti*<sup>33,34</sup>. The results obtained in these studies  
256 demonstrated that the mechanism of DENV blocking by *Wolbachia* is more complicated than a  
257 simple priming of the insect innate immune system. It will be interesting to investigate the complex  
258 mechanism involved in DENV-vector interactions. Availability of *Drosophila* mutants will help in  
259 deciphering the complex interactions involved in DENV infection. The binding proteins,  
260 susceptibility and virus titer of DENV-2 in *D. melanogaster* was not investigated in earlier studies.  
261 We, therefore, infected *D. melanogaster* with DENV-2 and found that *D. melanogaster* was not  
262 only susceptible to DENV-2 but also produced infectious DENV-2 particles. The DENV-2 infection  
263 in *D. melanogaster* seems to be a specific pathogenic process rather than nonspecific viremia. First,  
264 DENV-2 was detected in midgut, carcasses and brain after 7 days of post infection period in *D.*  
265 *melanogaster* similar to in *Ae. aegypti*. Second, DENV-2 virus produced in fly is equally infectious  
266 to both *D. melanogaster* and *Ae. aegypti*. Third, after 7 days post infection DENV-2 titers were  
267 comparable in *Ae. aegypti* and *D. melanogaster*. These qualities make *D. melanogaster* a potential  
268 model system for examining DENV-vector interactions. The *Drosophila* model system is useful in  
269 rapid and unbiased identification of host factors involved in pathogenesis<sup>12,14,19,26,27</sup>. Considering the

270 biosafety issues, the fruit fly system has certain added advantages in comparison with the  
271 anthropogenic vectors such as mosquito, sand fly and tick.

272 DENV-2 binding proteins in mosquito cells have been identified in several studies<sup>2,3,5,6</sup> [see  
273 supplementary Information Table 1]. However, the identity of most of the proteins is not  
274 conclusively determined. Proteins such as HSP 70Ba, ATP synthase sub unit beta, probable tubulin  
275 beta chain and prohibitin were found interacting with *Ae. aegypti* and *D. melanogaster*. Based on  
276 results obtained in the previous studies and current study, it is reasonable to infer that DENV-2 may  
277 share the similar receptor molecule(s) on dipteran cells<sup>2,3,5</sup>. HSP 70 proteins might be binding  
278 receptor and other proteins such as actin, tubulin, ATP synthase etc. might be secondary receptors.  
279 Although in most cases, individual viruses have their own distinct and specific receptors, in some  
280 cases the same set of receptors can be used by many different viruses. Japanese Encephalitis Virus  
281 (JEV), DENV and West Nile Virus (WNV) share the similar molecules for their entry into the  
282 mosquito cells<sup>2,3,5,6,35,36</sup>. Perhaps the best studied example of this is the HSP 70 of *Ae. aegypti*,  
283 which is used by DENV, JEV and WNV as a receptor<sup>2,5,6,7</sup>. As these molecules are house keeping in  
284 nature, they are present in other dipteran insects also. We hypothesize that DENV-2 might share  
285 similar receptors in dipteran insects such as *Ae. aegypti*, *Ae. albopictus* and *D. melanogaster*.

286 Interestingly in VOPBA experiments, Belle and RNA recognition protein were recognized  
287 as DENV-2 binding proteins. In *Drosophila*, Belle, a DEAD-box RNA helicase, has been  
288 documented to regulate RNA interference (RNAi)<sup>37</sup>. During the infection, interaction and co-  
289 localization of DDX3 (a human homologue of Belle) with arboviral proteins and viral RNA have  
290 been demonstrated<sup>38,39</sup>. Similarly, the role of RRM proteins in the post-transcriptional gene  
291 expression modulation of the *Drosophila* RNAi pathway is well documented<sup>37</sup>. These observations  
292 hint the possible involvement of *Drosophila* RNAi pathway in controlling the DENV-2 infection.  
293 Prohibitins (PHBs) are highly conserved proteins in eukaryotes and are associated with various  
294 cellular functions including the immune regulation. Role of prohibitin as a non-receptor interacting  
295 polypeptide in DENV-2 infection has been reported previously<sup>2,29</sup>. These observations suggest that

296 similar immune response might be triggered in *Ae. aegypti* and *D. melanogaster* to counteract the  
297 DENV-2 infection.

298 In the mosquito, arboviruses are confronted with RNAi, JAK-STAT and Toll pathway<sup>10-</sup>  
299 <sup>12,40-49</sup>. RNAi is one of the important innate antiviral pathways in *Ae. aegypti* that controls the  
300 arbovirus replication<sup>41,42,44-47,49-58</sup>. The recent reports demonstrated that RNAi pathway can  
301 eliminate the DENV from *Ae. aegypti* and Dcr-2 and Ago-2 knockdowns enhances the DENV  
302 replication<sup>42,45,47,49</sup>. Similarly it has been also demonstrated that DENV can grow in *Drosophila* S2  
303 cells and the RNAi regulates the DENV replication in these cells<sup>32</sup>. Therefore, we employed the  
304 *Drosophila* RNAi, JAK-STAT and Toll gene expression to address how a model innate system  
305 responds to DENV-2 infection. Transcript levels of most of the key mediator of RNAi response  
306 were up-regulated in response to DENV-2 infection at 7 days p.i.. Moderate modulation in RNAi  
307 pathway genes was observed at early time points 24 hrs and 48 hrs p.i.. Loqs expression was  
308 slightly down-regulated in response to DENV-2 infection. It has been demonstrated that dsRNA of  
309 viruses can be cleaved by Dcr-2 without Loqs-PD and complete knock down of Loqs-PD has no  
310 effect on antiviral silencing<sup>37,59</sup>. These observations suggest that Loqs have limited role in antiviral  
311 response in *Drosophila*.

312 Recent transcriptome analysis of DENV2-infected *Ae. aegypti* revealed the involvement  
313 miRNA pathway in virus infection<sup>51-53</sup>. The significant increase in unique miRNAs was observed  
314 during DENV infection in *Ae. aegypti*<sup>58</sup>. Over the course of infection, 9 days p.i. time point showed  
315 maximum number of unique modulated miRNAs<sup>58</sup>. It has been suggested at 9 days p.i. the repair  
316 mechanisms in uninfected mosquitoes is activated and results in to significant increase in the  
317 miRNA levels at time point<sup>58</sup>. The expression of Argonaute-1, Dicer-1, Drosha and Pasha increased  
318 during the time course of DENV infection in *D. melanogaster*. These observations suggest that  
319 miRNA pathway activity is altered during DENV-2 infection in *D. melanogaster*. The results  
320 obtained in current study corroborate with earlier studies that showed the presence of modulated  
321 miRNAs in DENV2 infection in mosquitoes.

322 A significant role of piRNA pathway has been also reported in various arbovirus  
323 infections<sup>54,55,57</sup>. It has been envisaged that a non-canonical piRNA pathway play important role in  
324 vector mosquitoes and target alphavirus replication<sup>54</sup>. The activity PIWI proteins and virus-specific  
325 piRNA molecules is also detected in somatic cells of *D. melanogaster* suggesting that the piRNA  
326 pathway plays important role in antiviral functions in insects<sup>50</sup>. Induction in transcript levels of  
327 Argonaute 3 AUB and PIWI suggest that DENV-2 replication is able to trigger the piRNA pathway.  
328 The miRNA, piRNA and siRNA pathways may act in amalgamation to control DENV-2 infection  
329 in *D. melanogaster*.

330 The up-regulation of JAK, STAT, REL1 and Toll proteins suggested the activation of the  
331 Toll pathway and JAK-STAT pathway (Table 3). In *Ae. aegypti*, the JAK-STAT and Toll pathway  
332 are involved in the anti-dengue defense<sup>10</sup>. Up-regulation of the Toll pathway has also been reported  
333 in *Ae. aegypti* in response to Sindbis virus infection<sup>40</sup>. The fruit fly seems to rely on RNAi, JAK-  
334 STAT and Toll to counteract DENV-2 infections. Though the JAK-STAT, RNAi and Toll pathways  
335 were seen to be induced in response to DENV infection, 60% of flies were still infected by DENV-  
336 2. These observations suggest that JAK-STAT, RNAi and Toll pathway are activated in response to  
337 DENV-2 infection but are not sufficient for complete elimination of DENV-2 in *Drosophila*.  
338 DENV-2 must have evolved strategies to counteract the effects of the JAK-STAT, RNAi and Toll  
339 pathway.

340 In depth studies on host factors involved in virus infection is necessary to design and  
341 develop effective intervention strategies. In many other insect vectors such as ticks, sand flies, fleas  
342 and other members of Culicidae family, amenable genetic systems limit in depth understanding of  
343 vector parasite interaction in these species. In this context, *Drosophila* becomes an attractive model  
344 system to elucidate the complex host-parasite interactions. *Drosophila* possesses the necessary  
345 repertoire of proteins that might require for virus entry. *D. melanogaster* supports the growth of  
346 WNV, SINV and DENV-2. Further the immune response mounted against arboviruses is similar in  
347 *D. melanogaster* and *Ae. aegypti*. Due to whole genome sequence and established techniques for

348 genetic and developmental manipulations, *D. melanogaster* turn out to be an attractive model  
349 organism to understand molecular and cellular mechanisms in host-arbovirus interactions. *D.*  
350 *melanogaster* could be used as surrogate invertebrate host model system and can be used to study  
351 parasite-vector interactions in less characterized vectors such as ticks, sand flies, fleas and other  
352 Culicine mosquitoes.

### 353 **CONCLUSION**

354 In conclusion, VOPBA revealed that DENV-2 exploit similar molecules in *D. melanogaster*  
355 and *Ae. aegypti* for its entry. *D. melanogaster* supports the growth of DENV-2 virus and *D.*  
356 *melanogaster* generated DENV-2 was able to infect the *Ae. aegypti* with similar kinetics. Results  
357 obtained in this study and earlier reports suggest that *D. melanogaster* and *Ae. aegypti* mount  
358 similar immune response against the invading arboviruses. These qualities make *D. melanogaster*, a  
359 potential model system for the study of arbovirus-vector interactions.

360

### 361 **ACKNOWLEDGEMENTS**

362 We thank the Director, National Institute of Virology, Pune for the providing the facilities. We  
363 thank Dr. Dipankar Chatterjee, Indian Institute of Science, Bangalore for MALDI TOF/TOF  
364 analysis. This research was supported by UGC-CAS to Department of Zoology, University of Pune  
365 and ICMR grant to Prof. Dileep Deobagkar.

366

### 367 **CONFLICT OF INTEREST**

368 The authors have declared that no competing interests exist.

369

### 370 **FINANCIAL DISCLOSURE**

371 The authors would like to acknowledge financial support provided by the UGC-CAS and ICMR.

372

### 373 **REFERENCES**

- 374 1. LaCount DJ, Vignali M, Chettier R, Phansalkar A, Bell R, Hesselberth JR, et al. A protein  
375 interaction network of the malaria parasite *Plasmodium falciparum*. *Nature* 2005; 438: 103-7.
- 376 2. Paingankar MS, Gokhale MD, Deobagkar DN. Dengue-2-virus-interacting polypeptides  
377 involved in mosquito cell infection. *Arch Virol* 2010; 155: 1453-61.
- 378 3. Kuadkitkan A, Wikan N, Fongsaran C, Smith DR. Identification and characterization of  
379 prohibitin as a receptor protein mediating DENV-2 entry into insect cells. *Virology* 2010;406:  
380 149–61.
- 381 4. Demogines A, Abraham J, Choe H, Farzan M, Sawyer SL. Dual Host-Virus Arms Races Shape  
382 an Essential Housekeeping Protein. *PLoS Biol* 2013; 11(5): e1001571.
- 383 5. Paingankar MS and Arankalle VA. Identification of chikungunya virus interacting proteins in  
384 mammalian cells. *J Biosci* 2014; 39: 389-99.
- 385 6. Chu JJ, Leong PW, Ng ML. Characterization of plasma membrane-associated proteins from  
386 *Aedes albopictus* mosquito (C6/36) cells that mediate West Nile virus binding and infection.  
387 *Virology* 2005; 339(2): 249-60.
- 388 7. Ren J, Ding T, Zhang W, Song J, Ma W. Does Japanese encephalitis virus share the same  
389 cellular receptor with other mosquito-borne flaviviruses on the C6/36 mosquito cells? *Virol J*  
390 2007; 4: 83.
- 391 8. Schneider D and Shahabuddin M. Malaria parasite development in a *Drosophila* model. *Science*  
392 2000; 288: 2376–79.
- 393 9. Matthews BJ, Dudchenko O, Kingan SB, Koren S, Antoshechkin I, Crawford JE. Improved  
394 reference genome of *Aedes aegypti* informs arbovirus vector control. *Nature* 2018; 563: 501–  
395 507.
- 396 10. Xi Z, Ramirez JL, Dimopoulos G. The *Aedes aegypti* Toll Pathway Controls Dengue Virus  
397 Infection. *PLoS Pathog* 2008; 4(7): e1000098.
- 398 11. Souza-Neto JA, Sim S, Dimopoulos G. An evolutionary conserved function of the JAK-STAT  
399 pathway in anti-dengue defense. *Proc Natl Acad Sci USA* 2009;106: 17841-6.



- 400 12. Waldock J, Olson KE, Christophides GK. *Anopheles gambiae* Antiviral Immune Response to  
401 Systemic O'nyong-nyong Infection. *PLoS Negl Trop Dis* 2012; 6(3): e1565.
- 402 13. Bonini NM and Fortini ME. Human neurodegenerative disease modeling using *Drosophila*.  
403 *Ann Rev Neurosci* 2003; 26: 627–656.
- 404 14. Dionne MS, Ghorri N, Schneider DS. *Drosophila melanogaster* is a genetically tractable model  
405 host for *Mycobacterium marinum*. *Infect Immun* 2003;71: 3540–50.
- 406 15. Bier E. *Drosophila*, the golden bug, emerges as a tool for human genetics. *Nat Rev Genet* 2005;  
407 6: 9–23.
- 408 16. Pandey UB and Nichols CD. Human disease models in *Drosophila melanogaster* and the role of  
409 the fly in therapeutic drug discovery. *Pharmacol Rev* 2011;63(2): 411-36.
- 410 17. Park SY, Ludwig MZ, Tamarina NA, He BZ, Carl SH, Dickerson DA, et al. Genetic  
411 Complexity in a *Drosophila* Model of Diabetes-Associated Misfolded Human Proinsulin.  
412 *Genetics*, 2013;196(2): 539-55.
- 413 18. Tutor AS, Prieto-Sánchez S, Ruiz-Gómez M. Src64B phosphorylates Dumbfounded and  
414 regulates slit diaphragm dynamics: *Drosophila* as a model to study nephropathies. *Development*  
415 2014;141(2): 367-76.
- 416 19. Mansfield BE, Dionne MS, Schneider DS, Freitag NE. Exploration of host-pathogen  
417 interactions using *Listeria monocytogenes* and *Drosophila melanogaster*. *Cell Microbiol* 2003;  
418 5: 901–11.
- 419 20. Needham AJ, Kibart M, Crossley H, Ingham PW, Foster SJ. *Drosophila melanogaster* as a  
420 model host for *Staphylococcus aureus* infection. *Microbiology* 2004; 150: 2347-55.
- 421 21. Blow NS, Salomon RN, Garrity K, Reveillaud I, Kopin A, et al. *Vibrio cholerae* infection of  
422 *Drosophila melanogaster* mimics the human disease cholera. *PLoS Pathog* 2005; 1(1): e8.
- 423 22. Garcia-Lara J, Needham AJ, Foster SJ. Invertebrates as animal models for *Staphylococcus*  
424 *aureus* pathogenesis: A window into host-pathogen interaction. *FEMS Immunol Med Microbiol*  
425 2005; 43: 311–23.

- 426 23. Chotkowski HL, Ciot AT, Jia Y, Puig-Basagoitic F, Kramer LD, Shi PY and Glaser RL. West  
427 Nile Virus Infection of *Drosophila melanogaster* induces a Protective RNAi Response. *Virology*  
428 2008; 377: 197–206.
- 429 24. Carpenter J, Hutter S, Baines JF, Roller J, Saminadin-Peter SS, et al. The Transcriptional  
430 Response of *Drosophila melanogaster* to Infection with the Sigma Virus (Rhabdoviridae). *PLoS*  
431 *ONE* 2009; 4(8): e6838.
- 432 25. Sessions OM, Barrows NJ, Souza-Neto JA, Robinson TJ, Hershey CL, Rodgers MA, et al.  
433 Discovery of insect and human dengue virus host factors. *Nature* 2009; 458: 1047-50.
- 434 26. Hughes TT, Allen AL, Bardin JE, Christian MN, Daimon K, Dozier KD, et al. *Drosophila* as a  
435 genetic model for studying pathogenic human viruses. *Virology* 2012; 423(1): 1-5.
- 436 27. Shaw AE, Veronesi E, Maurin G, Ftaich N, Guiguen F, Rixon F, et al. *Drosophila melanogaster*  
437 as a Model Organism for Bluetongue Virus Replication and Tropism. *J Virol* 2012;  
438 86(17):9015-24. doi: 10.1128/JVI.00131-12.
- 439 28. Querenet M, Danjoy ML, Mollereau B, Davoust N. Expression of dengue virus NS3 protein in  
440 *Drosophila* alters its susceptibility to infection. *Fly (Austin)* 2015;9(1):1-6. doi:  
441 10.1080/19336934.2015.1072662.
- 442 29. Apte-Deshpande A, Paingankar MS, Gokhale MD and Deobagkar DN. *Serratia odorifera* a  
443 midgut inhabitant of *Aedes aegypti* mosquito enhances its susceptibility to dengue-2 virus. *PLoS*  
444 *ONE* 2012; 7(7): e40401.
- 445 30. Lanciotti RS, Calisher CH, Gubler DJ, Chang GJ, Vance vorndam A. Rapid detection and  
446 typing of dengue viruses from clinical samples by using reverse transcriptase-polymerase chain  
447 reaction. *J Clin Microbiol* 1992; 30(3): 545-551.
- 448 31. Hu Y, Sopko R, Foos M, Kelley C, Flockhart I, Ammeux N, et al. FlyPrimerBank: an online  
449 database for *Drosophila melanogaster* gene expression analysis and knockdown evaluation of  
450 RNAi reagents. *G3: Genes Genomes Genetics* 2013; 3(9): 1607-16.

- 451 32. Mukherjee S and Hanley KA. RNA interference modulates replication of dengue virus in  
452 *Drosophila melanogaster* cells. *BMC Microbiol* 2010; 10: 127.
- 453 33. Rancès E, Ye YH, Woolfit M, McGraw EA, O'Neill SL. The relative importance of innate  
454 immune priming in Wolbachia-mediated dengue interference. *PLoS Pathog* 2012; 8(2):  
455 e1002548.
- 456 34. Rancès E, Johnson TK, Popovici J, Iturbe-Ormaetxe I, Zakir T, Warr CG, et al. The toll and Imd  
457 pathways are not required for wolbachia-mediated dengue virus interference. *J Virol* 2013;  
458 87(21): 11945-9.
- 459 35. Boonsanay V and Smith DR. Entry into and production of the Japanese encephalitis virus from  
460 C6/36 cells. *Intervirolog* 2007; 50(2): 85-92.
- 461 36. Vega-Almeida TO, Salas-Benito M, De Nova-Ocampo MA, del Angel RM, Salas-Benito JS.  
462 Surface proteins of C6/36 cells involved in dengue virus 4 binding and entry. *Arch Virol* 2013;  
463 158 (6): 1189-1207.
- 464 37. Meister G. Argonaute proteins: functional insights and emerging roles. *Nature Rev Genet* 2013;  
465 14: 447–59.
- 466 38. Khadka S, Vangeloff AD, Zhang C, Siddavatam P, Heaton NS, Wang L, et al. A physical  
467 interaction network of dengue virus and human proteins. *Mol Cell Proteom* 2011; 10(12):  
468 M111-012187.
- 469 39. Li C, Ge LL, Li PP, Wang Y, Dai JJ, Sun MX et al. Cellular DDX3 regulates Japanese  
470 encephalitis virus replication by interacting with viral un-translated regions. *Virology* 2014; 449:  
471 70-81.
- 472 40. Sanders HR, Foy BD, Evans AM, Ross LS, Beaty BJ, et al. Sindbis virus induces transport  
473 processes and alters expression of innate immunity pathway genes in the midgut of the disease  
474 vector, *Aedes aegypti*. *Insect Biochem Mol Biol* 2005; 35: 1293–1307.
- 475 41. Campbell CL, Keene KM, Brackney DE, Olson KE, Blair CD, Wilusz J, et al. *Aedes aegypti*  
476 uses RNA interference in defense against Sindbis virus infection. *BMC Microbiol* 2008; 8: 47.

- 477 42. Sanchez-Vargas I, Scott JC, Poole-Smith BK, Franz AWE, Barbosa-Solomieu V, Wilusz J,  
478 et al. Dengue virus type 2 infections of *Aedes aegypti* are modulated by the mosquito's RNA  
479 interference pathway. *PLOS Pathog* 2009; 5: e1000299.
- 480 43. Ramirez JL and Dimopoulos G. The Toll immune signaling pathway control conserved anti-  
481 dengue defenses across diverse *Ae. aegypti* strains and against multiple dengue virus serotypes.  
482 *Dev Comp Immunol* 2010; 34: 625–29.
- 483 44. Khoo CCH, Piper J, Sanchez-Vargas I, Olson KE, Franz AWE. The RNA interference pathway  
484 affects midgut infection- and escape barriers for Sindbis virus in *Aedes aegypti*. *BMC Microbiol*  
485 2010;10: 130.
- 486 45. Scott JC, Brackney DE, Campbell CL, Bondu-Hawkins V, Hjelle B, Ebel GD, et al.  
487 Comparison of dengue virus type 2-specific small RNAs from RNA interference-competent  
488 and-incompetent mosquito cells. *PLOS Negl Trop Dis* 2010; 4: e848.
- 489 46. Siu R, Frangkoudis R, Simmonds P, Donald CL, Chase-Topping ME, Barry G, et al. Antiviral  
490 RNA interference responses induced by Semliki Forest virus infection of mosquito cells:  
491 characterization, origin, and frequency-dependent functions of virus-derived small interfering  
492 RNAs. *J Virol* 2011; 85: 2907-17.
- 493 47. Hess AM, Abhishek NP, Ptitsyn A, Ebel GD, Olson KE, Barbacioru C, et al. Small RNA  
494 profiling of dengue virus-mosquito interactions implicates the PIWI RNA pathway in anti-viral  
495 defense. *BMC Microbiol* 2011; 11: 45.
- 496 48. Blair CD. Mosquito RNAi is the major innate immune pathway controlling arbovirus infection  
497 and transmission. *Future Microbiol* 2011; 6: 265–77.
- 498 49. Khoo CC, Doty JB, Heersink MS, Olson KE, Franz AW. Transgene-mediated suppression of  
499 the RNA interference pathway in *Aedes aegypti* interferes with gene silencing and enhances  
500 Sindbis virus and dengue virus type 2 replication. *Insect Mol Biol* 2013; 22(1): 104-14.

- 501 50. Wu Q, Luo Y, Lu R, Lau N, Lai EC, Li WX, et al. Virus discovery by deep sequencing and  
502 assembly of virus-derived small silencing RNAs. *Proc Natl Acad Sci USA* 2010; 107(4): 1606-  
503 1611.
- 504 51. Behura SK, Gomez-Machorro C, Harker BW, deBruyn B, Lovin DD, et al. Global Cross-Talk  
505 of Genes of the Mosquito *Aedes aegypti* in Response to Dengue Virus Infection. *PLoS Negl*  
506 *Trop Dis* 2011; 5(11): e1385.
- 507 52. Colpitts TM, Cox J, Vanlandingham DL, Feitosa FM, Cheng G, et al. Alterations in the *Aedes*  
508 *aegypti* Transcriptome during Infection with West Nile, Dengue and Yellow Fever Viruses.  
509 *PLoS Pathog* 2011; 7 (9): e1002189.
- 510 53. Bonizzoni M, Dunn WA, Campbell CL, Olson KE, Marinotti O, et al. Complex Modulation of  
511 the *Aedes aegypti* Transcriptome in Response to Dengue Virus Infection. *PLoS ONE* 2012;  
512 7(11): e50512.
- 513 54. Morazzani EM, Wiley MR, Murreddu MG, Adelman ZN, Myles KM. Production of Virus-  
514 Derived Ping-Pong-Dependent piRNA-like Small RNAs in the Mosquito Soma. *PLoS Pathog*  
515 2012; 8(1): e1002470.
- 516 55. Vodovar N, Bronkhorst AW, van Cleef KWR, Miesen P, Blanc H, et al. Arbovirus-Derived  
517 piRNAs Exhibit a Ping-Pong Signature in Mosquito Cells. *PLoS ONE* 2012; 7(1): e30861.
- 518 56. Marques JT, Wang JP, Wang X, de Oliveira KPV, Gao C, et al. Functional Specialization of the  
519 Small Interfering RNA Pathway in Response to Virus Infection. *PLoS Pathog* 2013; 9(8):  
520 e1003579.
- 521 57. Schnettler E, Donald CL, Human S, Watson M, Siu RWC, McFarlane M, et al. Knockdown of  
522 piRNA pathway proteins results in enhanced Semliki Forest virus production in mosquito cells.  
523 *J Gen Virol* 2013; 94: 1680-89.
- 524 58. Campbell CL, Harrison T, Hess AM and Ebel GD. MicroRNA levels are modulated in *Aedes*  
525 *aegypti* after exposure to Dengue-2. *Insect Mol Biol* 2014; 23(1): 132-9.

526 59. Marques JT, Kim K, Wu PH, Alleyne TM, Jafari N, et al. Loqs and R2D2 act sequentially in the  
527 siRNA pathway in *Drosophila*. *Nat Struct Mol Biol* 2010; *17*: 24–30.  
528

529 **Figure legends**

530 **Fig. 1. DENV-2 binding proteins in *D. melanogaster*.** A) Membrane proteins from *D.*  
531 *melanogaster* midgut (lane L1, lane L2 and lane L3) were subjected to SDS–12.5% PAGE,  
532 transferred to nitrocellulose membrane, and incubated with DENV-2 (lanes L1, lane L2) and PBS  
533 (lane L3) at 37°C for 1 hour. The putative Dengue virus interacting proteins revealed after  
534 incubation with the anti-dengue-2 rabbit antibody (Lane L1 and Lane L3) and with a second  
535 antibody, an antibody mouse anti rabbit IgG conjugated to peroxidase. Lane B was only incubated  
536 with secondary antibody. Color was developed with H<sub>2</sub>O<sub>2</sub> and DAB. B) Verification of MALDI  
537 TOF/TOF results using monoclonal antibodies Membrane proteins were subjected to 12.5% SDS  
538 PAGE and transferred to nylon membrane. Anti HSP70 antibody, Anti tubulin antibody and anti  
539 prohibitin antibody detected the bands corresponding to 70 kDa, 48 kDa and 32 kDa respectively.  
540 Anti actin antibody detected band corresponding to 42 kDa. However, 42 kDa band was not  
541 detected in VOPBA.

542

543 **Fig. 2. Susceptibility of *D. melanogaster* to DENV-2.** A) Detection of DENV-2 in head squash of  
544 *D. melanogaster* and *Ae. aegypti*: *D. melanogaster* and *Ae. aegypti* were intra thoracically injected  
545 with DENV-2 (3-4 µl of 10<sup>6</sup> PFU /ml) or PBS (pH 7.4). DENV-2 was detected in head squash at 7  
546 days p.i. using immuno-fluorescence microscopy. DENV-2 stained with FITC conjugated antibody  
547 (green color) and the neural tissue mass with Evan's Blue (red color). I) *D. melanogaster* head  
548 squash, II) *A. aegypti* mosquitoes flies III) Midgut of *D. melanogaster*. B) RT-PCR detection of  
549 DENV-2: DENV-2 detected in carcasses of *D. melanogaster* and *Ae. aegypti* using RT-PCR. 1)  
550 Uninfected *Ae. aegypti* 2) Uninfected *D. melanogaster* 3) Oral infection DENV-2 in *Ae. aegypti* 4)  
551 intra thoracic injection of DENV-2 in *Ae. aegypti* 5) intra thoracic injection of DENV-2 in *D.*  
552 *melanogaster* 6) DNA ladder 100bp 7) intra thoracic injection of homogenate of DENV-2 positive  
553 *D. melanogaster* in *Ae. aegypti* 8) oral feeding of homogenate of DENV-2 positive *D. melanogaster*  
554 in *Ae. aegypti* 9) intra thoracic injection of homogenate of DENV-2 positive *D. melanogaster* in *D.*

555 *melanogaster* 10) non template control (NTC). C) *Ae. aegypti* and *D. melanogaster* susceptibility to  
556 DENV-2: Percent DENV-2 positive head squash preparations of mosquitoes and flies were detected  
557 by immunofluorescence assay. DENV-2 inoculated *Ae. Aegypti* and *D. melanogaster* flies showed  
558 similar pattern of DENV-2 susceptibility (Mann-Whitney U test  $P>0.05$ ) D) DENV-2 quantitation  
559 using plaque assay: DENV-2 titers in carcasses of individual *D. melanogaster* and *Ae. aegypti* at 2  
560 hrs p.i. and 7 days p.i were quantitated using plaque assay.\* significant difference in plaque forming  
561 units as compared to 2hrs p.i..

562

563 **Supplementary Information Table S1:** DENV-2 interacting proteins in insect cells

564

565 **Supplementary Information Table S2:** Molecular identification of DENV-2 binding proteins  
566 from *D. melanogaster* midgut using 1D and 2D VOPBA



**Table 1: Primers used for real time PCR**

|    | Gene Name | Gene ID            | Forward Primer         | Tm     | Reverse Primer          | Tm     | Product size |
|----|-----------|--------------------|------------------------|--------|-------------------------|--------|--------------|
| 1  | 18s       | KC177303           | ATAAGACCTCTGTTCTGCTTTC | 60°C   | CTCTCGCGTCGTAATACTAATG  | 60°C   | 92           |
| 2  | ADAR      | CG12598            | TGCTGAATGAGCTAAGACATGG | 60.1°C | TGAATAGAGGTGCGTGTACCG   | 61.6°C | 75           |
| 3  | Ago1      | CG6671             | GTGTCCGCGAAAGGTGAAC    | 61.3°C | AGATTGTTGCGACCATCGAAC   | 61°C   | 102          |
| 4  | Ago2      | CG13452,<br>CG7439 | TTCGACAAGCCCATGCGAG    | 62.7°C | AAAGAAGGAACGACCGACACG   | 62.6°C | 93           |
| 5  | Ago3      | CG40300            | AGCTAACGACGGATGAATCCA  | 61°C   | TGGTTCCACCGAGTTTATCCT   | 60.5°C | 123          |
| 6  | Aub2      | CG6137             | TTACGCCTGATGTGGAGGCTA  | 62.7°C | GGGGCTATCTTGAACAGCTTTG  | 61.2°C | 134          |
| 7  | Dicer1    | CG4792             | TTCCACTGGTGC GACAACAAT | 62.5°C | CCCAGGCAAATAATCGTGTTC   | 61.5°C | 107          |
| 8  | Dicer2    | CG6493             | GCTTTTATGTGGGTGAACAGGG | 61.4°C | GGCTGTGCCAACAAGAACTT    | 61.1°C | 92           |
| 9  | Drosha    | CG8730             | GGAGACACCGGCTCCTTATG   | 61.7°C | ACTTCTGTGCTTGTTCGTTGTAA | 60.6°C | 107          |
| 10 | FMR1      | CG6203             | GCCAATTACAGCCAAGACCTT  | 60.6°C | CGCTTCTGAGTGTGCTCAAAC   | 61.8°C | 183          |
| 11 | JAK       | CG1594             | AGGATTTCTCAATCGCCTT    | 58°C   | CAGCTGCATCAGGTCGTAAA    | 60°C   | 86           |
| 12 | Loqs      | CG6866             | AGCGCCATGTGAAGCTCAA    | 62.3°C | CAGGATCACCAACATCTGACAG  | 60.4°C | 96           |
| 13 | Pasha     | CG1800             | AAGTCCTACCCGAGGGATGG   | 62.3°C | TCCAGTGCCGAGAAAATAGGG   | 61.5°C | 113          |

|    |            |                     |                        |        |                       |        |     |
|----|------------|---------------------|------------------------|--------|-----------------------|--------|-----|
| 14 | PIWI2      | CG6122              | TCTTCATCAGGTGACCCGAGA  | 62.1°C | CTTCACGCCTGGGAGCTTC   | 62.7°C | 85  |
| 15 | Prohibitin | CG15081,<br>CG10691 | AGCCGCCTATGGAGTCAGT    | 62.4°C | CTCGGAGTAAATGTCGCTCTG | 60.2°C | 103 |
| 16 | R2D2       | CG7138              | TGATGAAGGATTCGACTGTGGG | 61.7°C | GGACGCAGTAGTCACGCAG   | 62.7°C | 90  |
| 17 | Relish     | CG11992             | TGGATACCATCAAAATGGCCTG | 60.4°C | CTTGTACCGAAAGCGGAACTT | 60.6°C | 103 |
| 18 | RNBP21     | CG12234             | TTAAGGAGGAGTCGCCAATGT  | 60.9°C | TCGCACTTGCTGGTTAGACTG | 62.3°C | 77  |
| 19 | STAT       | CG4257              | CCTCGGTATGGTCACACCC    | 61.4°C | TGCCAAACTCATTGAGGGACT | 61.4°C | 77  |
| 20 | Toll       | CG5490              | AATCCCACGTTTAGGCTAACCA | 61.4°C | CCTCACCGATCCGCAACTT   | 62°C   | 112 |
| 21 | VIG1       | CG4170              | ATGGACAGCGCCGGTAAAAAT  | 62.7°C | GCTGACGGTTGCTTCTTCTTG | 61.8°C | 134 |

568

569

**Table 2: Molecular identification of DENV-2 binding proteins from *D. melanogaster* midgut.**

| No. | Accession No.           | Protein Description                                 | Mol. Mass (kDa) |               | Mass values matched |
|-----|-------------------------|-----------------------------------------------------|-----------------|---------------|---------------------|
|     |                         |                                                     | From Figure 1   | From Database |                     |
| 1   | <b><u>NP_536783</u></b> | Belle CG9748-PA                                     | 84              | 85.029        | 10                  |
| 2   | <b><u>AAO49246</u></b>  | Gamma-tubulin ring complex subunit Dgrip71          | 78              | 71.704        | 14                  |
| 3   | <b><u>AAK67155</u></b>  | Heat shock protein Hsp70Ba*                         | 70              | 70.191        | 10                  |
| 4   | <b><u>Q05825</u></b>    | ATP synthase subunit beta                           | 55              | 54.074        | 13                  |
| 5   | <b><u>Q9VRX3</u></b>    | Probable tubulin beta chain*                        | 48              | 50.697        | 7                   |
| 6   | <b><u>NP_724165</u></b> | Lethal (2) 37Cc CG10691-PA, isoform A (Prohibitin)* | 32              | 30.384        | 13                  |
| 7   | <b><u>AAN71293</u></b>  | RE08878p RNA recognition motif protein              | 26              | 28.007        | 7                   |

Sequence coverage is over 20% in all samples. One dimensional VOPBA and two dimensional VOPBA showed similar results therefore only results obtained in one dimensional VOPBA are listed in Table 1. Additional information on protein identification from one dimensional and two dimensional VOPBA is given in Supplementary Information Table S2.

\* The monoclonal anti-prohibitin antibody (Abcam, USA) interacted with 32-kDa protein, anti-tubulin antibody (Sigma Aldrich, Germany) recognized 48 kDa protein and anti-HSP70 antibody (Abcam, USA) recognized the 70-kDa protein in brush border membrane fractions of *D. melanogaster* midgut.

**Table 3:** Relative gene expression changes in *D. melanogaster* in response to DENV-2 infection

| Gene Name                         | Fold change mean (SD) |                 |                 |
|-----------------------------------|-----------------------|-----------------|-----------------|
|                                   | 24 hours p.i.         | 48 hours p.i.   | 7 days p.i.     |
| <b>miRNAi pathway</b>             |                       |                 |                 |
| Argonaute 1                       | 1.868 (0.636)         | 1.351 (0.221)   | 2.883 (0.521)*  |
| DICER 1                           | 1.828 (0.344)         | 2.698 (0.413) * | 3.247 (0.433) * |
| Drosha                            | 1.109 (0.282)         | 0.827 (0.005)   | 2.168 (0.101) * |
| Pasha                             | 0.979 (0.170)         | 0.774 (0.061)   | 2.738 (0.002) * |
| ADAR                              | 0.619 (0.164)         | 0.425 (0.020) * | 0.441 (0.016) * |
| RNBP21                            | 1.015 (0.253)         | 0.844 (0.024)   | 1.702 (0.199)   |
| <b>piRNAi pathway</b>             |                       |                 |                 |
| Argonaute 3                       | 1.036 (0.318)         | 1.067 (0.177)   | 3.216 (0.613) * |
| AUB                               | 1.242 (0.218)         | 1.328 (0.184)   | 2.808 (0.229) * |
| PIWI                              | 0.760 (0.237)         | 0.889 (0.130)   | 1.989 (0.076) * |
| <b>siRNAi pathway</b>             |                       |                 |                 |
| Argonaute 2                       | 2.806 (1.258)         | 2.435 (0.138) * | 2.415 (0.537) * |
| DICER 2                           | 1.063 (0.282)         | 0.829 (0.052)   | 1.982 (1.706) * |
| R2D2                              | 1.095 (0.283)         | 0.84 (0.088)2   | 2.444 (0.076) * |
| Loqs                              | 0.579 (0.049)         | 0.399 (0.044)   | 0.508 (0.095)   |
| FMR                               | 0.955 (0.288)         | 0.742 (0.087)   | 2.749 (0.171) * |
| VIG                               | 1.071 (0.329)         | 0.602 (0.160)   | 0.744 (0.008)   |
| <b>Other immune related genes</b> |                       |                 |                 |
| JAK                               | 4.498 (1.061) *       | 4.030 (0.734) * | 4.655 (1.207)   |
| STAT                              | 1.695(0.659)          | 2.963(0.653) *  | 3.211(0.893) *  |
| Prohibitin                        | 1.177 (0.271)         | 1.292 (0.465)   | 1.723 (0.228) * |
| Rel1                              | 1.421 (0.336)         | 1.010 (0.106)   | 1.760 (0.134)   |
| Toll                              | 1.866 (0.438)         | 2.576 (1.072)   | 4.131 (0.370) * |

The quantitative expression of the target gene was normalized to 18s mRNA in the same samples. \* Significant difference (Mann-Whitney U test  $P < 0.05$ ).

**A**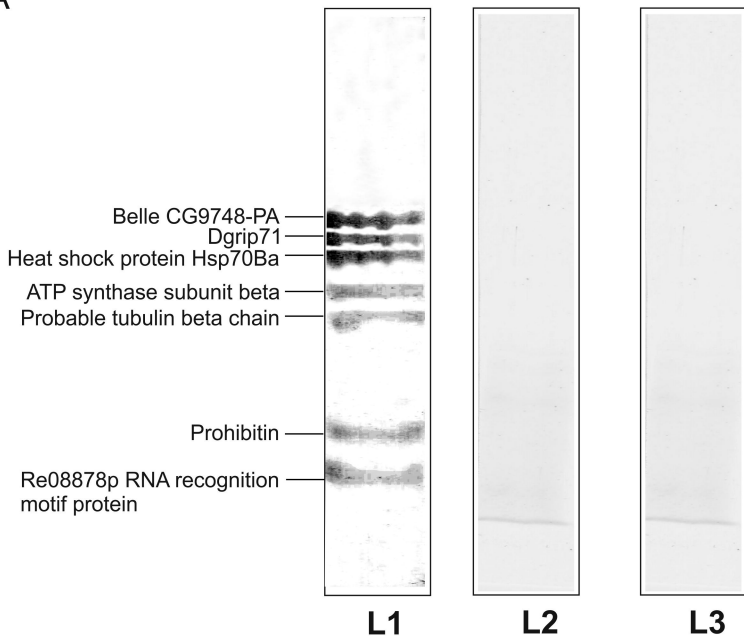**B**

|                                                                                  | Molecular Mass | Antibody used                | Identity                    |
|----------------------------------------------------------------------------------|----------------|------------------------------|-----------------------------|
|  | 32 kDa         | prohibitin (Abcam, USA)      | Prohibitin                  |
|  | 48 kDa         | $\beta$ tubulin (Sigma, USA) | Probable tubulin beta chain |
|  | 70 kDa         | HSP70 (Sigma, USA)           | Heat shock protein Hsp70Ba  |

**A**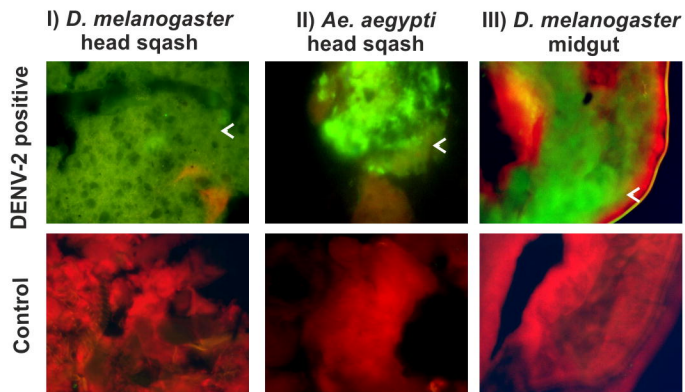**B**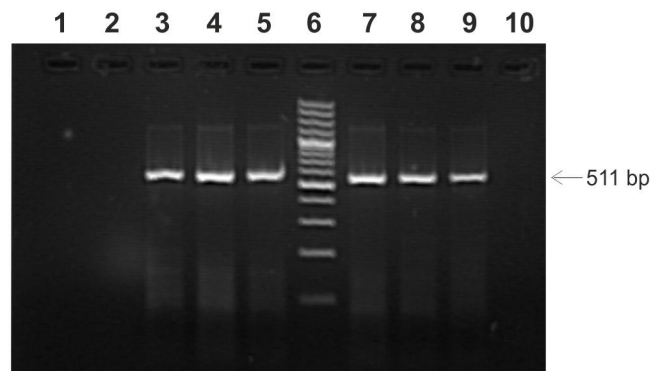**C**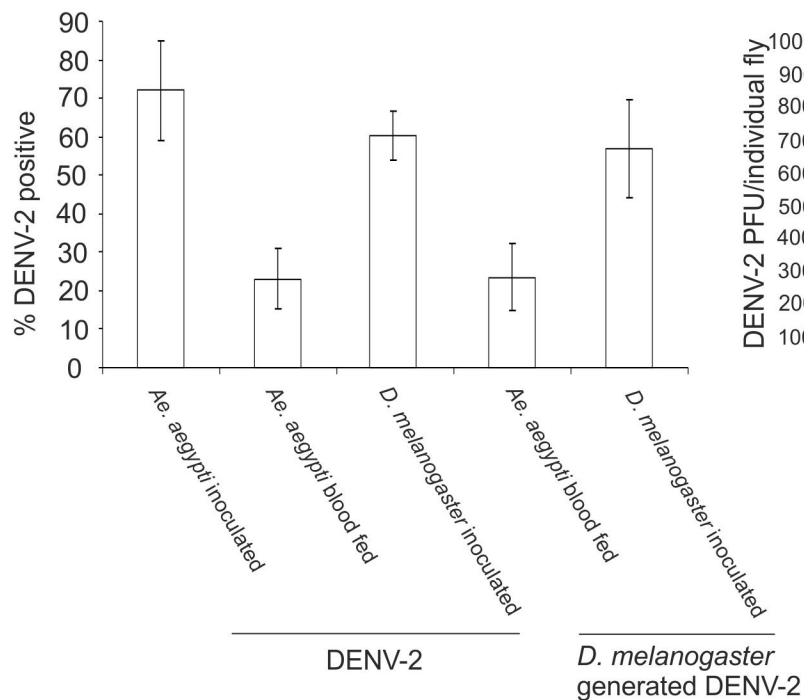**D**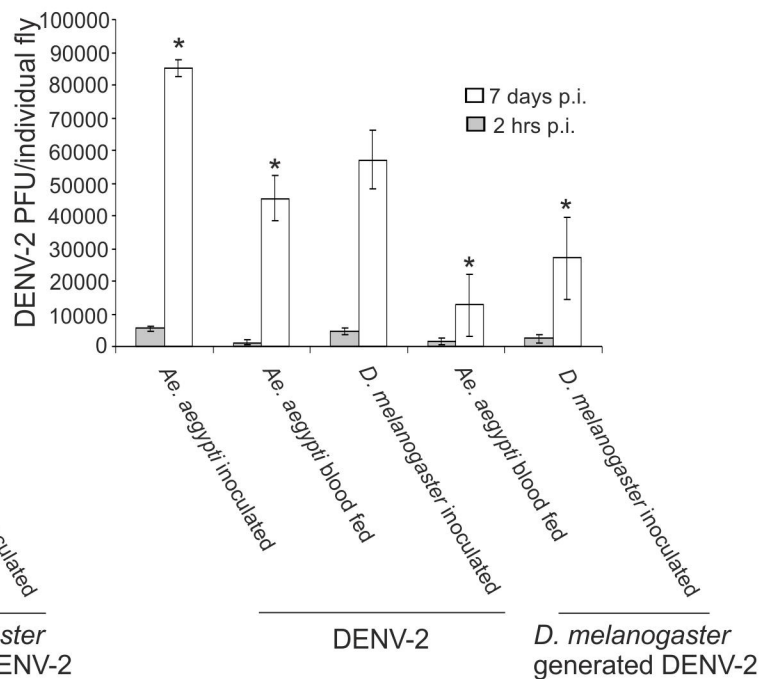

Source: https://www.biorxiv.org/content/biorxiv/early/2020/09/04/2020.09.03.282350.full.pdf
